# Supplementary material
Source: PubMed Central journal article supplement (PMC5321540)
Supplement: NIHMS838266-supplement-Supplemental_Materials.pdf [file NIHMS838266-supplement-Supplemental_Materials.pdf]

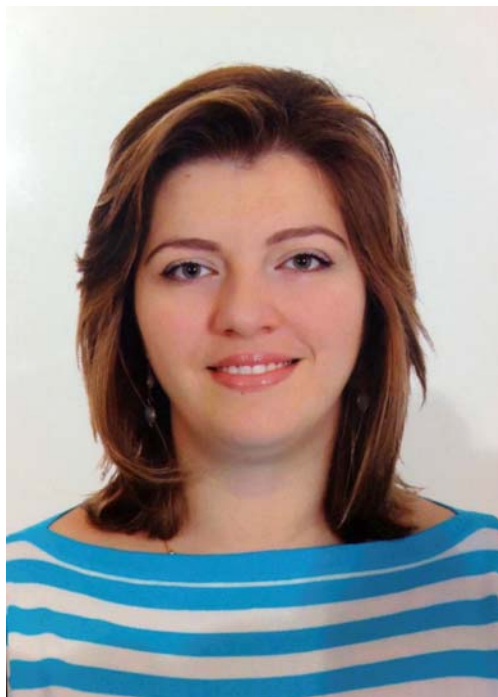

Christiane E. Al-Haddad is an Associate Professor of pediatric ophthalmology and adult strabismus at the American University of Beirut Medical Center in Beirut, Lebanon. She received her fellowship training in pediatric ophthalmology and adult strabismus at Ch...

Christiane E. Al-Haddad, Marwan Abdulaal, Ahmad Al-Moujahed, Ann-Margret Ervin, Karine Ismail

**Fornix-Based Versus Limbal-Based Conjunctival Trabeculectomy Flaps for Glaucoma: Findings From a Cochrane Systematic Review**

American Journal of Ophthalmology, Volume 174, 2017, 33–41

<http://dx.doi.org/10.1016/j.ajo.2016.10.006>
